# Supplementary material
Source: HighWire-hosted journal article supplement (https://www.annfammed.org/highwire/filestream/13241/field_highwire_adjunct_files/0/Kieber-Emmoons_Supplemental.pdf)
Supplement: Kieber-Emmoons_Supplemental.pdf [file Kieber-Emmoons_Supplemental.pdf]

## Supplemental materials for:

Kieber-Emmons AM,<sup>1</sup> Topmiller M,<sup>2</sup> Carrozza M.<sup>3</sup> Population mapping for quality improvement in a neighborhood health center. *Ann Fam Med*. 2020;18(4):374.

<sup>1</sup>Neighborhood Health Centers of the Lehigh Valley, Allentown, Pennsylvania

<sup>2</sup>Lehigh Valley Health Network, Department of Family Medicine, Allentown, Pennsylvania

<sup>3</sup>Morsani School of Medicine, University of South Florida, Tampa, Florida

<sup>3</sup>HealthLandscape, American Academy of Family Physicians, Cincinnati, Ohio

**Submitted September 9, 2019; submitted, revised, October 30, 2019; accepted November 11, 2019.**

**Key words:** population health; cancer health disparities; geospatial mapping methods; social determinants of health

---

## References

1. The population health profiler. HealthLandscape, American Academy of Family Physicians. <https://www.healthlandscape.org/pophealthprofiler/>.
2. Butler DC, Petterson S, Phillips RL, Bazemore AW. Measures of social deprivation that predict health care access and need within a rational area of primary care service delivery. *Health Serv Res*. 2013;48(2 Pt 1):539-559.
